# Supplementary material for: Stimuli-responsive fluorescence switching of cyanostilbene derivatives: ultrasensitive water, acidochromism and mechanochromism
Source: Royal Society of Chemistry journal article supplement (doi:10.1039/c8ra03598a), 2018-01-01
Supplement: c8ra03598a1.pdf [file c8ra03598a1.pdf]

## Supporting Information

Bin Wang, <sup>a,b</sup> ChunYing Wei <sup>a\*</sup>

<sup>a</sup> Key Laboratory of Chemical Biology and Molecular Engineering of Ministry of Education, Institute of Molecular Science, Shanxi University, Taiyuan 030006, P. R. China. E-mail: weichuny@sxu.edu.cn

<sup>b</sup> School of Basic Medical Sciences, Shanxi Medical University, Taiyuan 030001, P. R. China. Tel:(+)86-351-7010699;

### Contents

**S-I Tables**

**S-II Figures**

## S-I Tables and figures

**Table S1** Detailed absorption ( $\lambda_a$ ) and emission peak ( $\lambda_f$ ) positions of *o*N-TPA in the different solvents

| solvents           | $\Delta f(\epsilon, n)$ | <i>o</i> N-TPA      |                     |                               |
|--------------------|-------------------------|---------------------|---------------------|-------------------------------|
|                    |                         | $\lambda_a$<br>(nm) | $\lambda_f$<br>(nm) | $\nu_a-\nu_f(\text{cm}^{-1})$ |
| Hexane             | 0.0012                  | 370                 | 474                 | $6.0 \times 10^3$             |
| Toluene            | 0.014                   | 381                 | 503                 | $6.3 \times 10^3$             |
| Butyl ether        | 0.096                   | 370                 | 499                 | $7.0 \times 10^3$             |
| Isopropyl ether    | 0.145                   | 373                 | 513                 | $7.3 \times 10^3$             |
| Ethyl ether        | 0.167                   | 368                 | 524                 | $8.09 \times 10^3$            |
| Ethyl acetate      | 0.200                   | 375                 | 561                 | $8.9 \times 10^3$             |
| Tetrahydrofuran    | 0.210                   | 376                 | 569                 | $9.0 \times 10^3$             |
| Dichloromethane    | 0.217                   | 379                 | 605                 | $9.9 \times 10^3$             |
| Dimethyl formamide | 0.276                   | 381                 | 638                 | $10.5 \times 10^3$            |
| Acetonitrile       | 0.305                   | 376                 | 650                 | $11.2 \times 10^3$            |

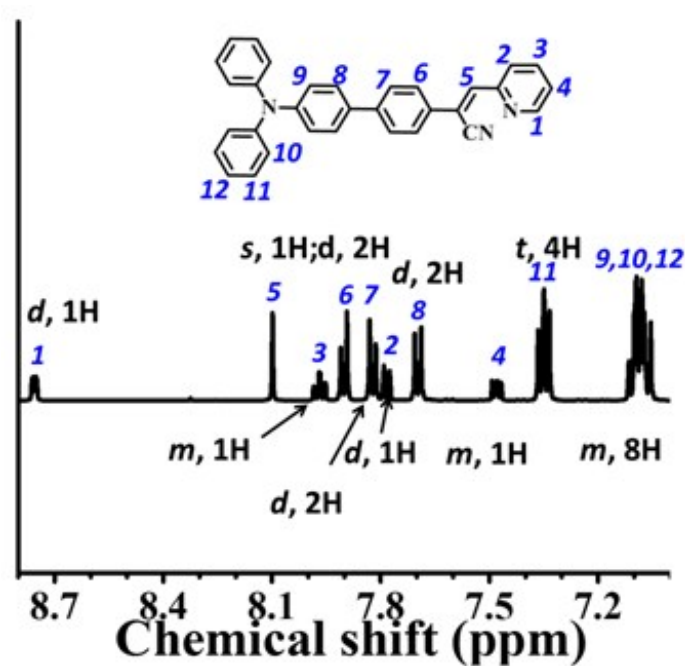

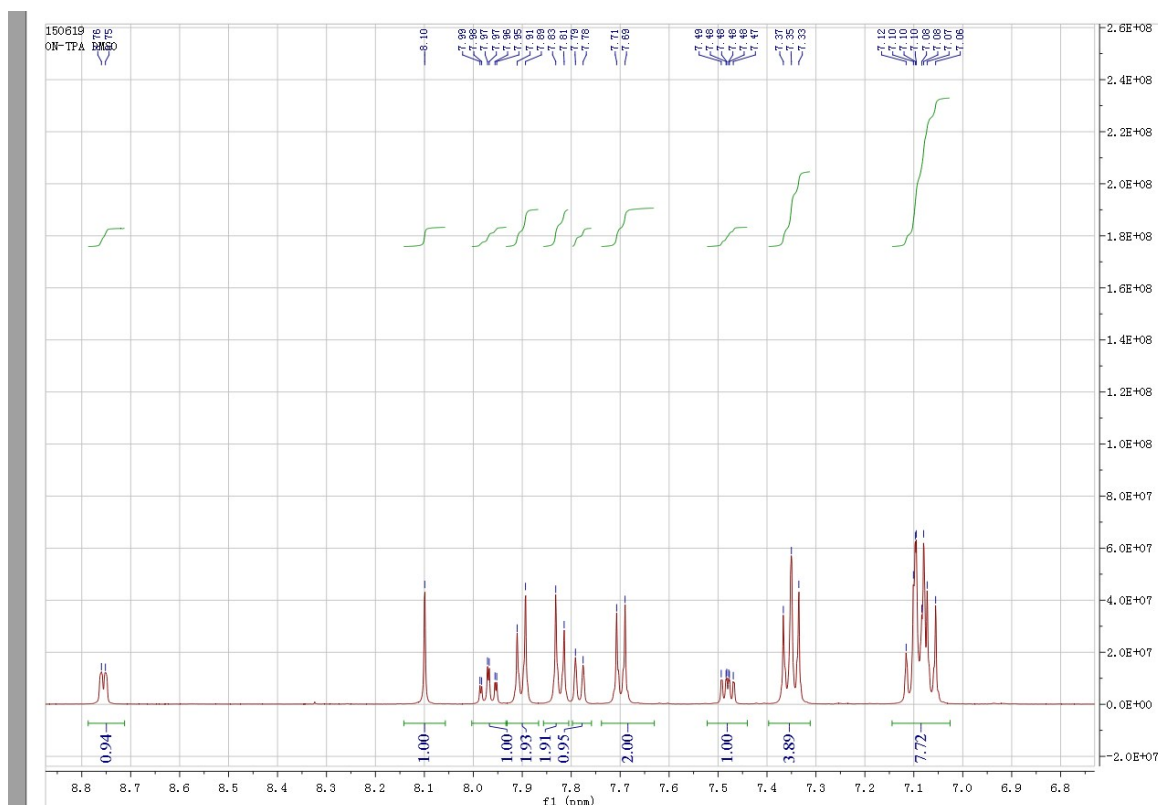

Figure S1  $^1\text{H}$  NMR of *o*N-TPA in DMSO

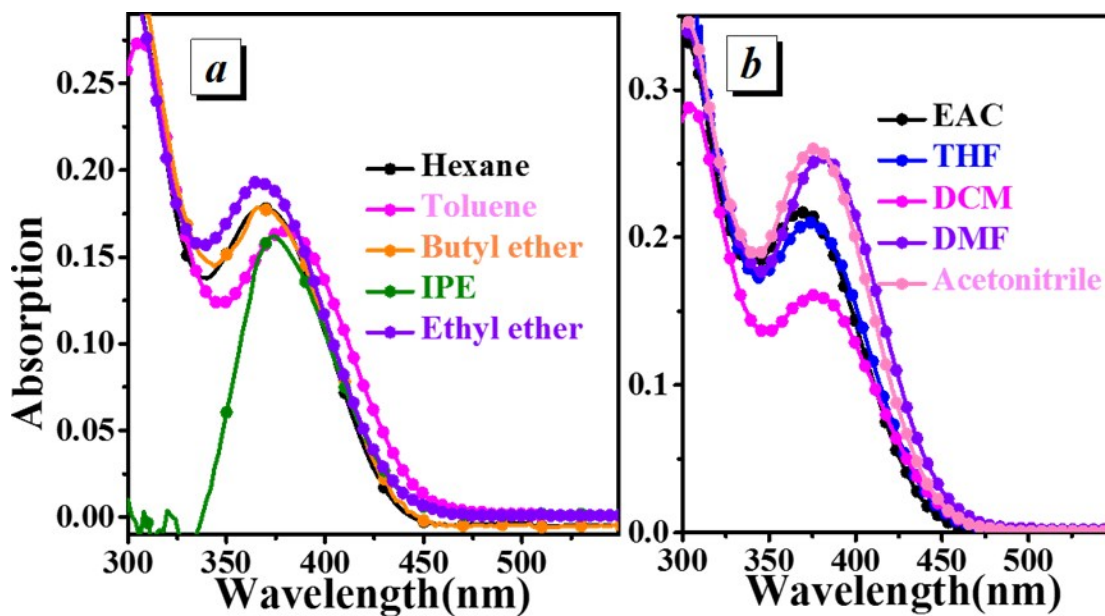

Figure S2 UV-vis absorption spectra of *o*N-TPA measured in the different solvents with the increasing orientational polarizability ( $\Delta f$ ). *n*-Hexane: 0.0012; toluene: 0.014; butyl ether: 0.096; isopropyl ether (IPE): 0.145; ethyl ether: 0.167; ethyl acetate (EA): 0.200; tetrahydrofuran (THF): 0.210; dimethyl formamide (DMF); and acetonitrile: 0.305.

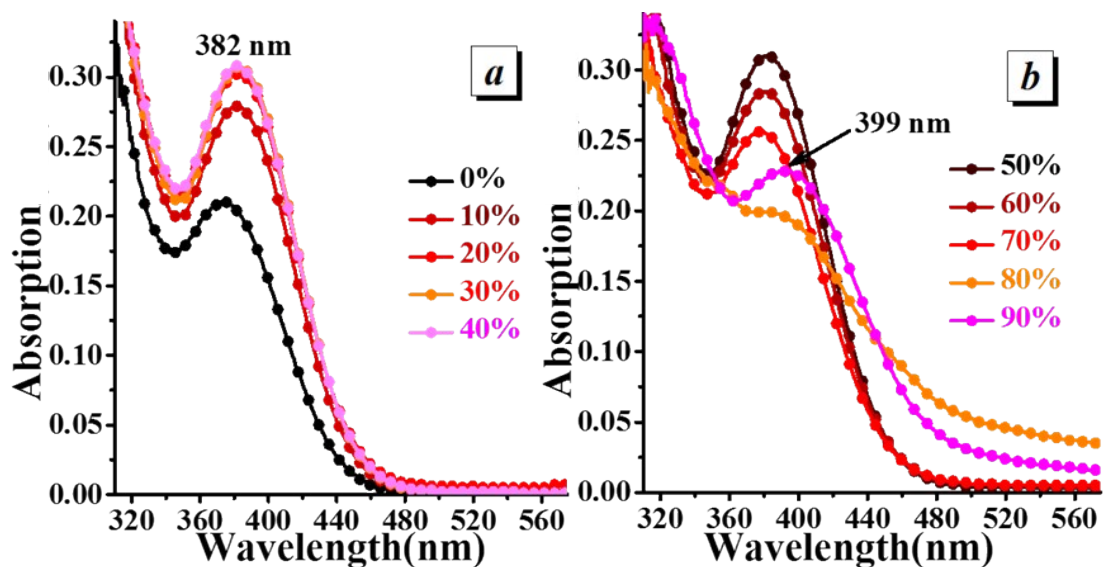

**Figure S3** UV-vis absorption spectra of 10  $\mu\text{M}$  *o*N-TPA in THF alone (0 %) and THF-water mixture with water fractions from 10 % to 90 % (v/v).

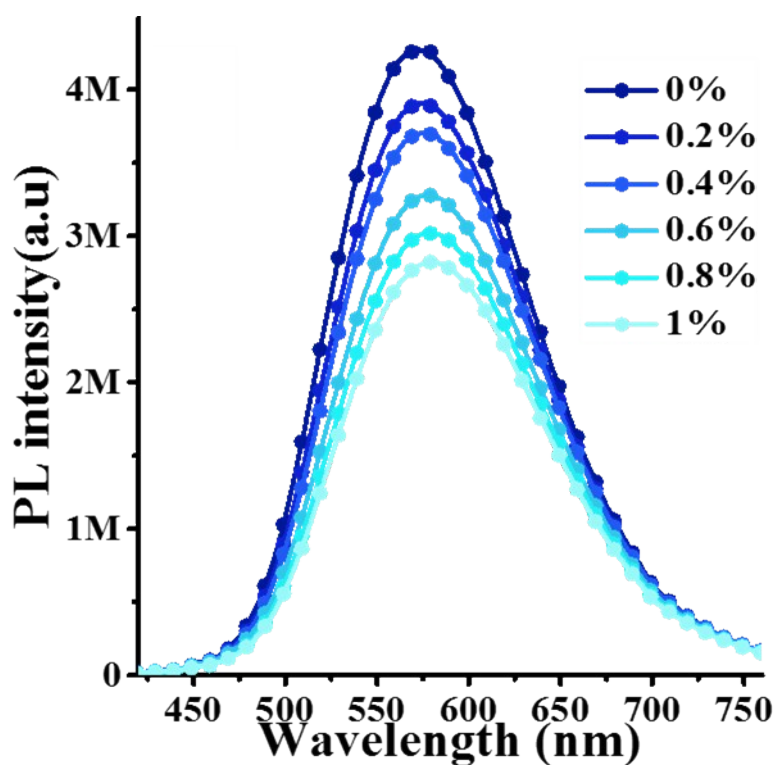

**Figure S4** PL spectra change of 10  $\mu\text{M}$  *o*N-TPA with the increasing water fraction from 0 to 1.0% (v/v) in THF (excitation at 410 nm, slit width 3).

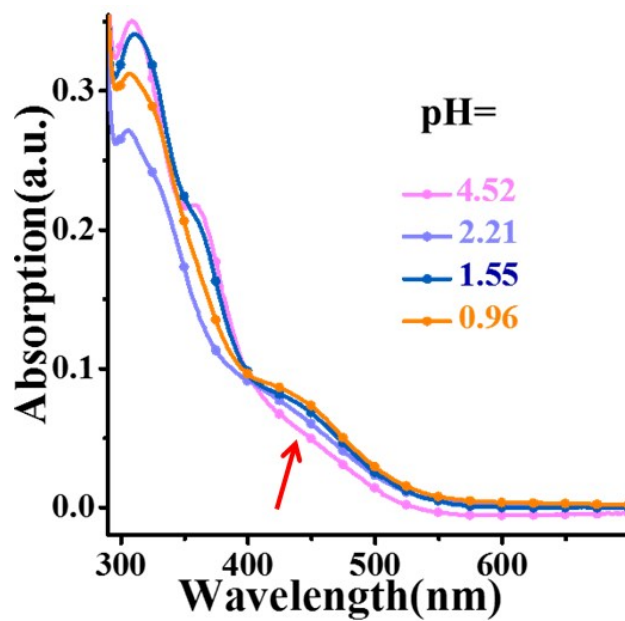

Fig.S5 Absorption spectra of 10  $\mu$ M *o*N-TPA after adding the different concentration of TFA to tune the pH values of solution in THF-water mixtures with  $f_w=90\%$ .

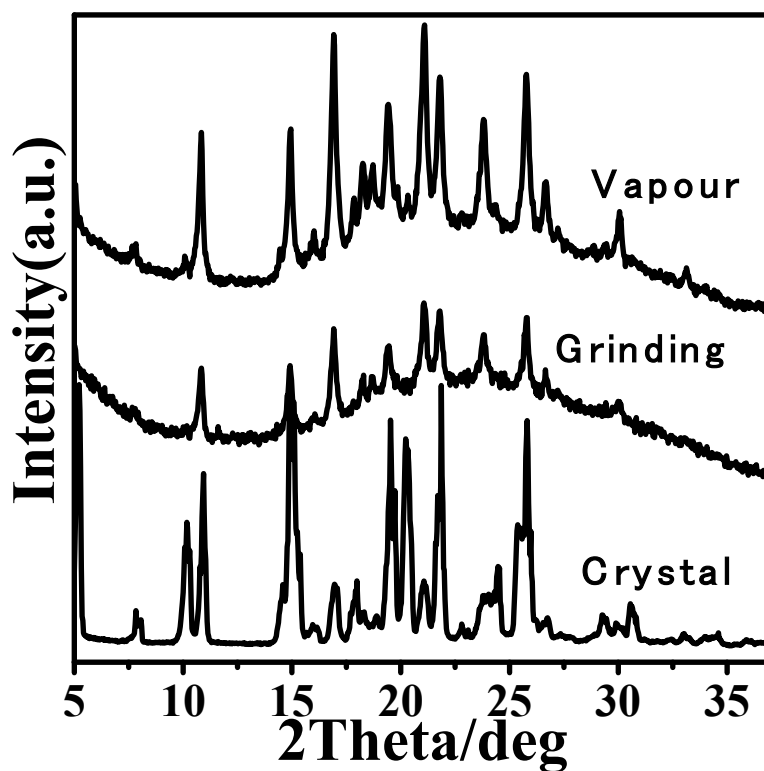

Fig. S6 Powder X-ray diffraction patterns of samples *o*N-TPA in the different states;

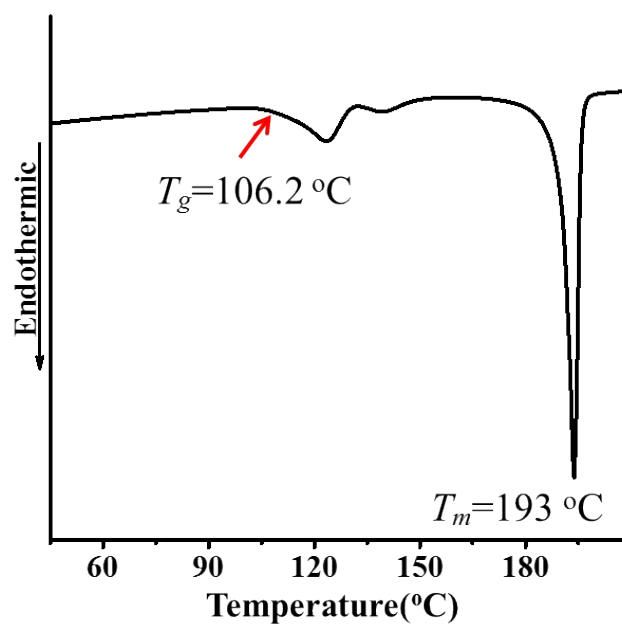

**Fig. S7** the DSC curves (heating and cooling) of *o*N-TPA ground powders under a nitrogen atmosphere with heating and cooling rate of  $10\text{ °C min}^{-1}$

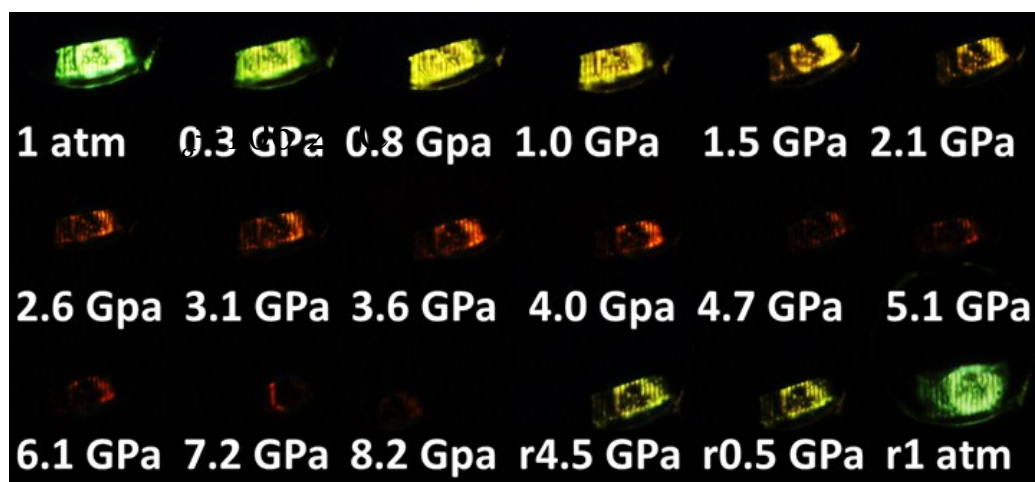

**Fig. S8** fluorescence photographs of the Dye (*o*N-TPA, 5% wt/wt)-doped polymers (PMMA) film under different hydrostatic pressure (from compression to decompression).
